# Supplementary material for: Atomic force microscopy observation of surface morphologies and measurements of local contact potential differences of amorphous solid water samples deposited at 15 and 100 K
Source: Royal Society of Chemistry journal article supplement (doi:10.1039/d3cp05523j), 2024-01-01

## Supplementary information

Atomic force microscopy observation of surface morphologies and measurements of local contact potential differences of amorphous solid water samples deposited at 15 and 100 K

*Takuto Tomaru, Hiroshi Hidaka, Akira Kouchi Naoki Watanabe*

*Institute of Low Temperature Science, Hokkaido University, Sapporo, 060-0819, Japan*

All fitting data used for the derivation of averaged values in Table 1

Topographic data were obtained at three different surface areas for each temperature. The measurements were conducted three times at 15 K and four times at 100 K for each surface.

X-direction analysis at 15K

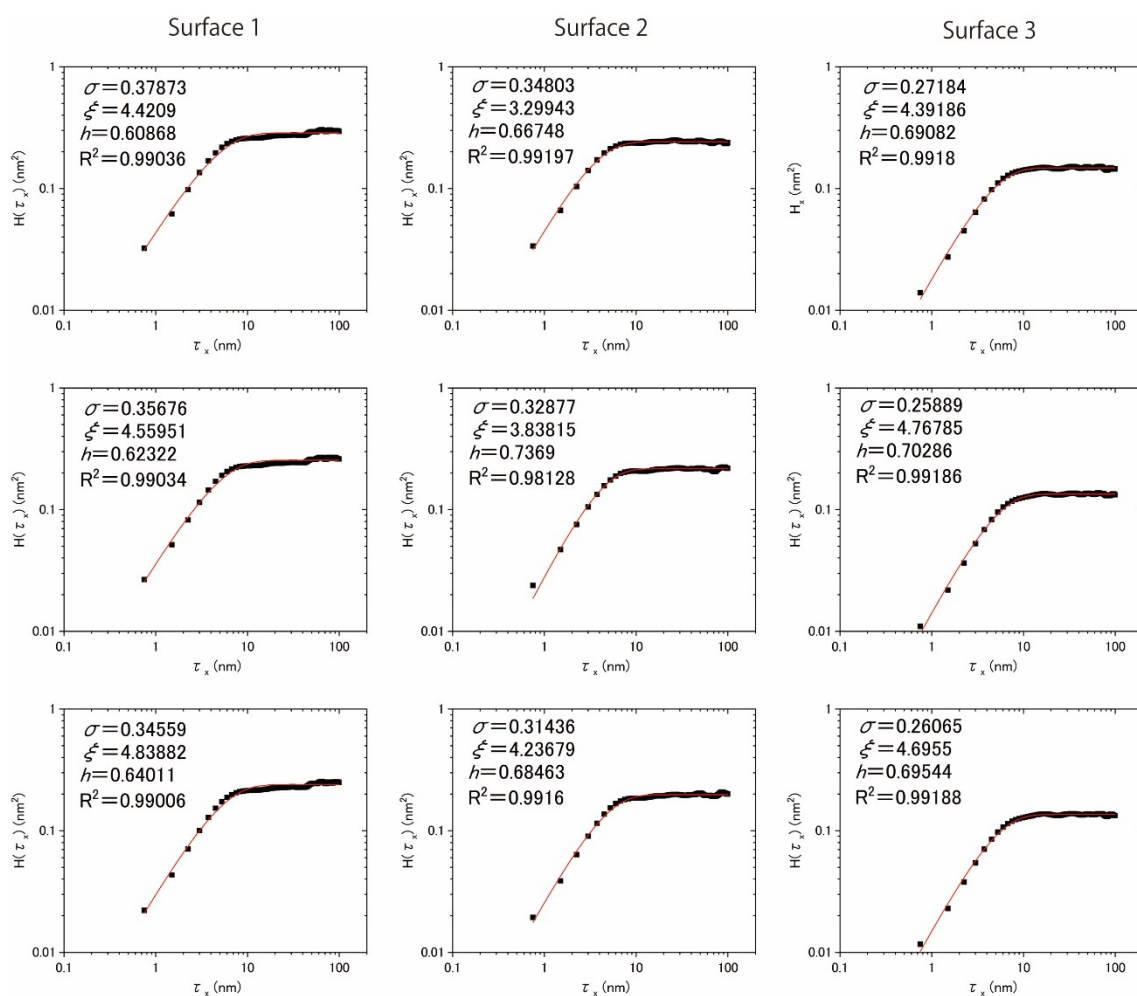

## Y-direction analysis at 15K

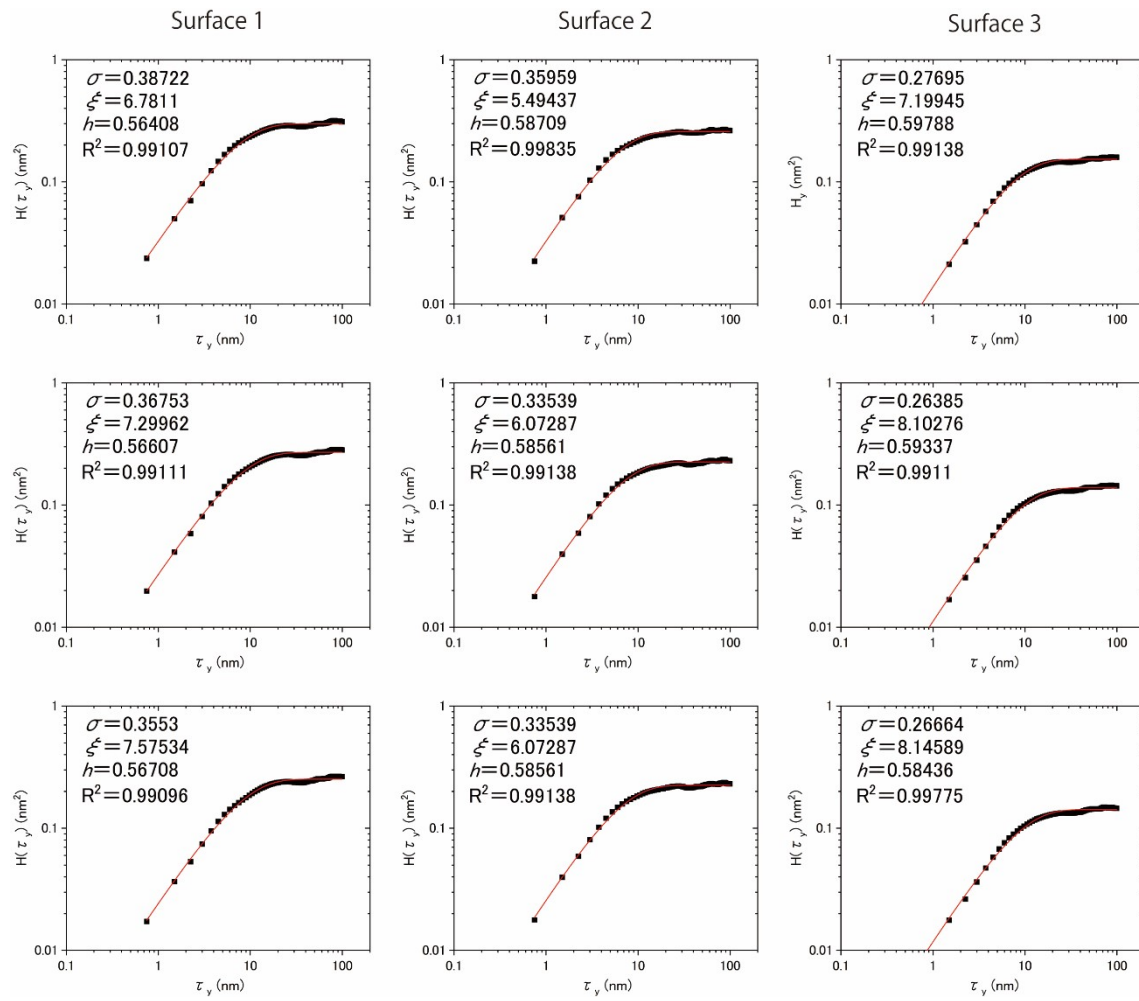

# X-direction analysis at 100K

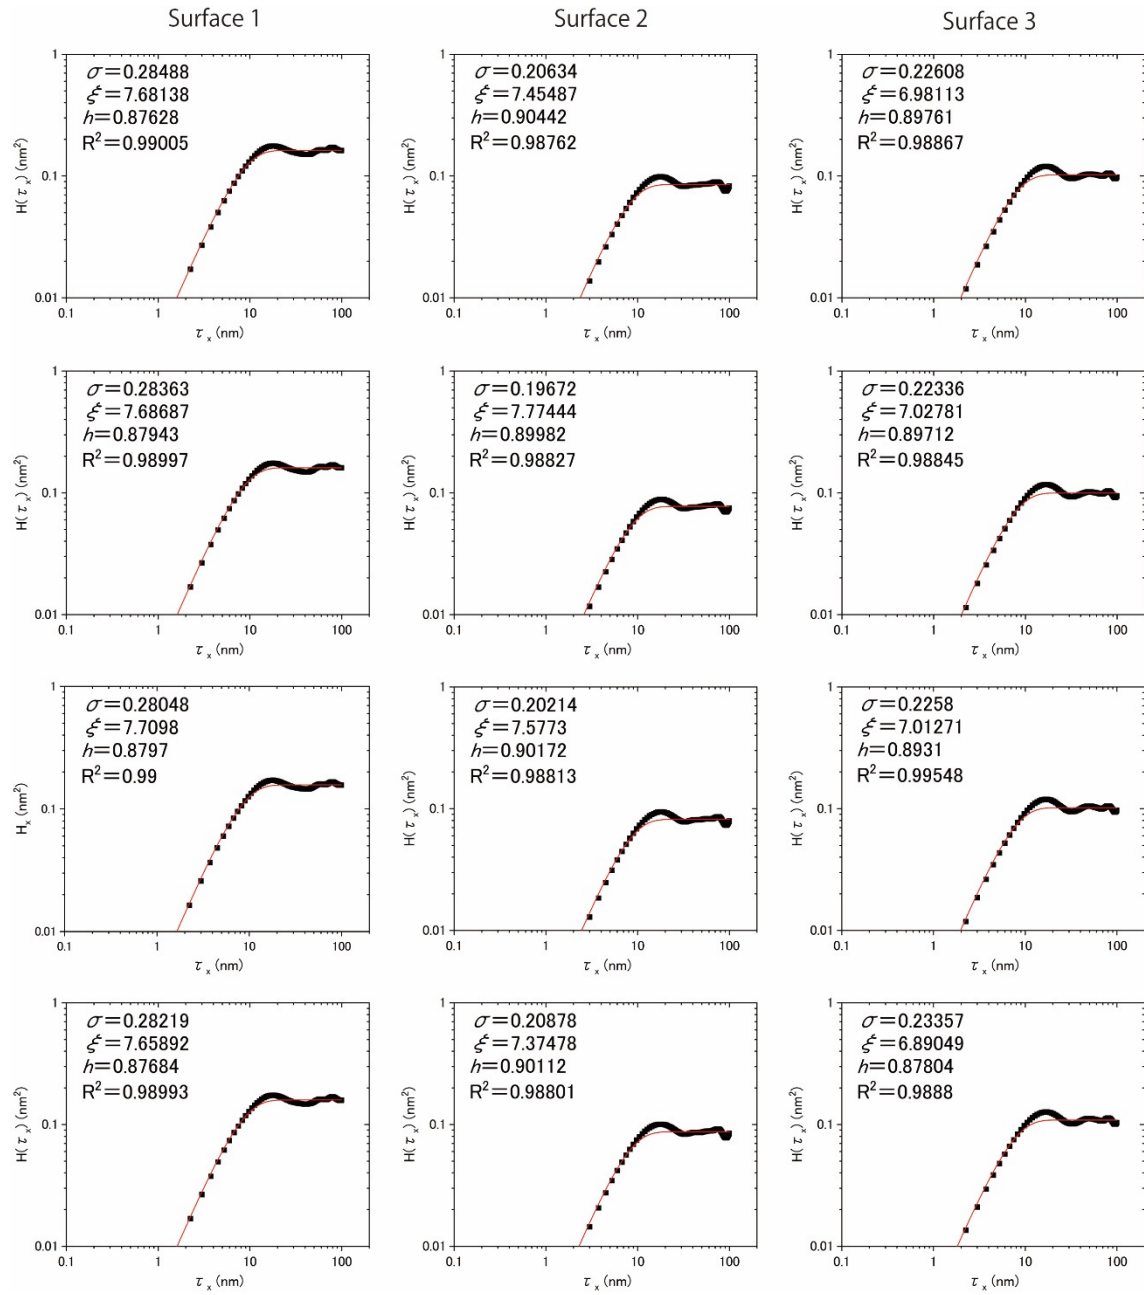

## Y-direction analysis at 100K

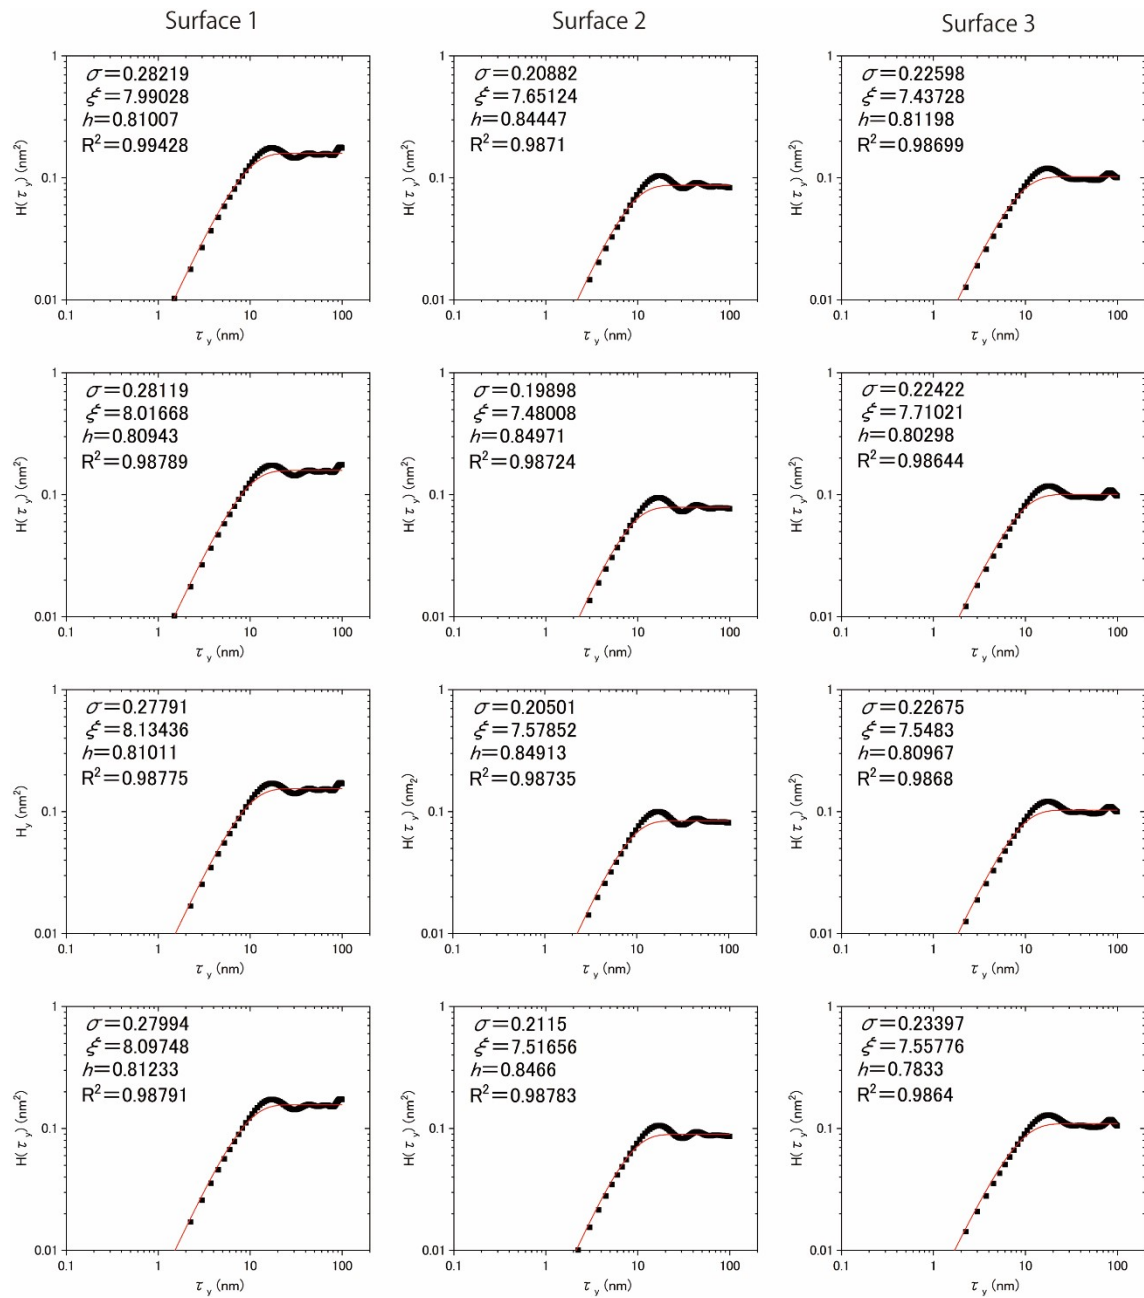

Supplement: d3cp05523j1.pdf [file d3cp05523j1.pdf]
